# Supplementary material for: CO2 reduction on the Li–Ga liquid metal surface
Source: Royal Society of Chemistry journal article supplement (doi:10.1039/d3ta00408b), 2023-01-01
Supplement: d3ta00408b4.pdf [file d3ta00408b4.pdf]

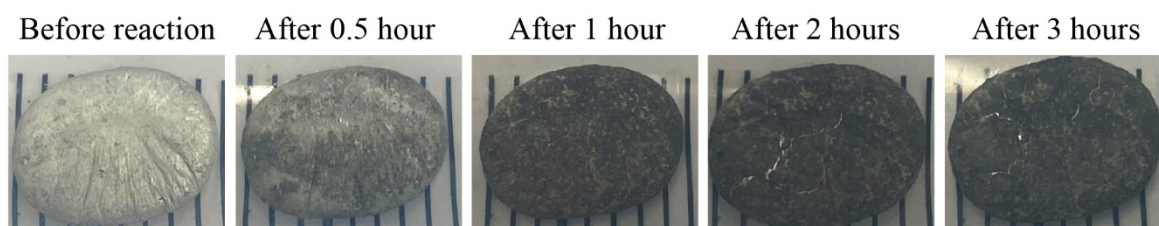

**Fig. S1** Surface change with time of 0.2 wt. % Li-Ga alloy reacting with CO<sub>2</sub> in a syringe reactor.

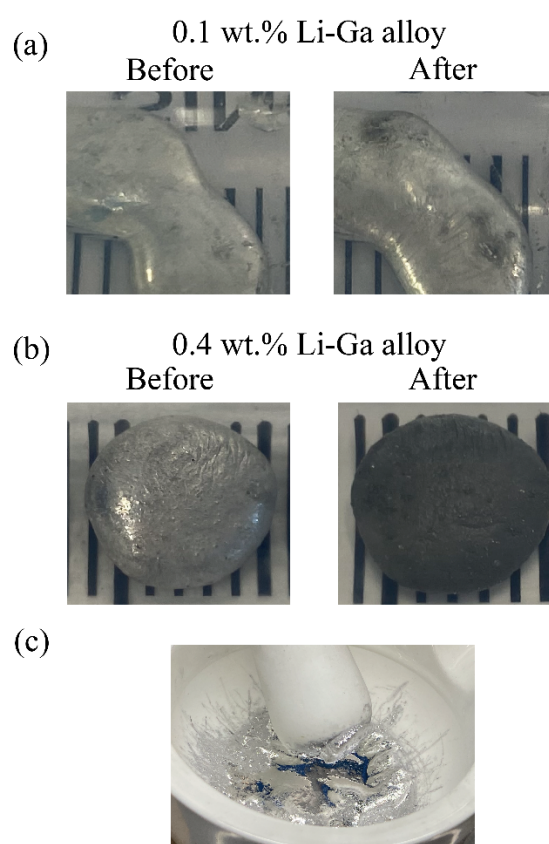

Figure S2. Li-Ga liquid metal alloys with different Li weight percentages. a) 0.1 wt.% showing localized reaction on the surface, b) 0.4 wt.%, c) Paste-like fluidity after the alloying process is seen for 0.4 wt.% alloy.

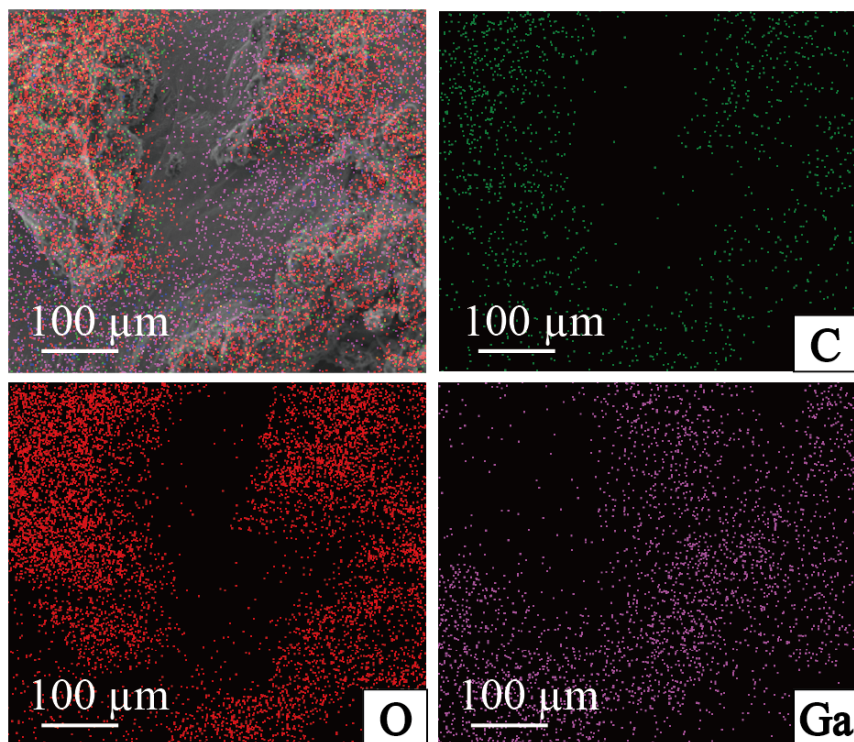

**Fig. S3** Elemental mapping on the surface of Li-Ga alloy after reaction showing the gallium base below the crust layer.

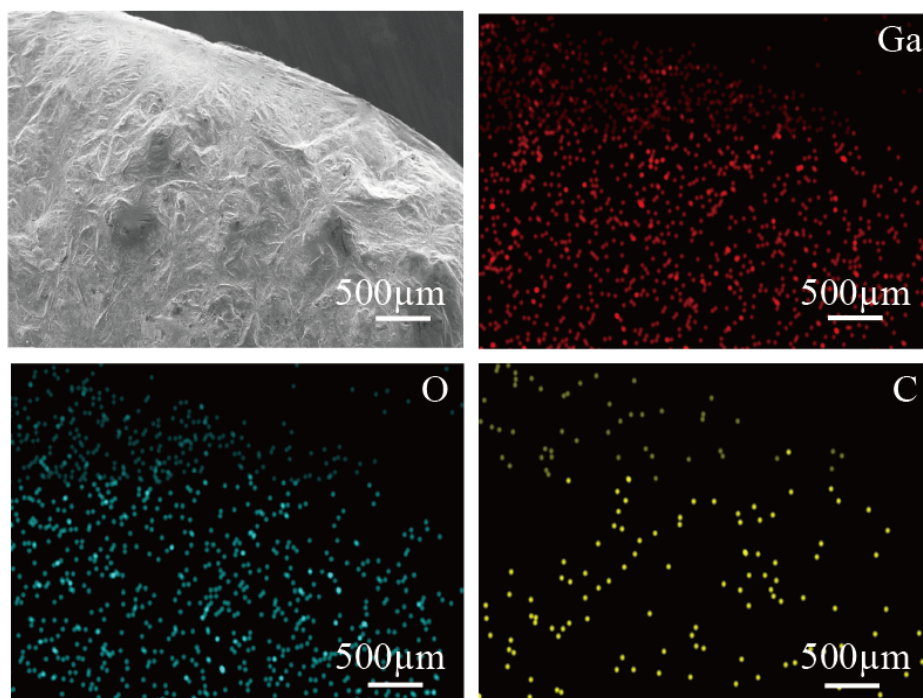

**Fig. S4** Elemental mapping on the surface of Li-Ga alloy after reaction with  $\text{CO}_2$  at  $0\text{ }^\circ\text{C}$  for one day.

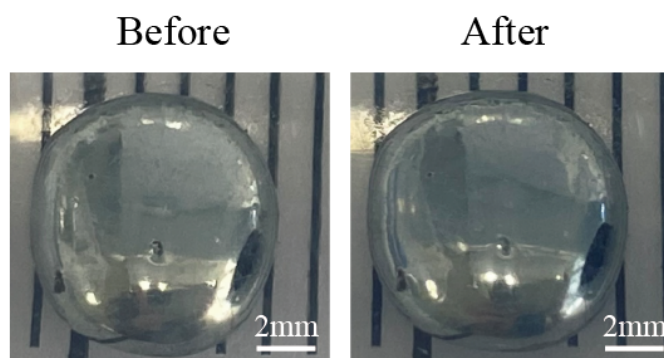

**Fig. S5** Li-Ga alloy in an argon atmosphere at  $50\text{ }^\circ\text{C}$  for one day.

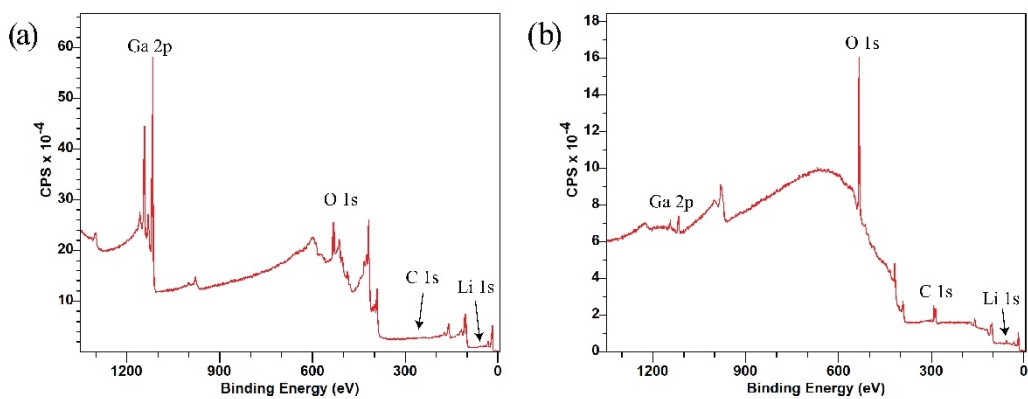

**Fig. S6** XPS survey spectra on the surface of liquid metal alloy a) after cleaning the surface with a GCIS ion gun showing no carbon contamination and a low amount of Li is present as shown in bar charts of Fig 1. b) The sample is immediately transferred inside XPS from the analysis chamber into the gas reaction chamber using the transfer arms. After melting and exposing the alloy inside the reaction chamber, the sample was transferred back to analysis chamber using the built-in transfer arm, in which spectra showed a 40 % increase in signal intensity for Li and peaks corresponding to carbon and carbonate appeared as shown in Fig 3 a-d.

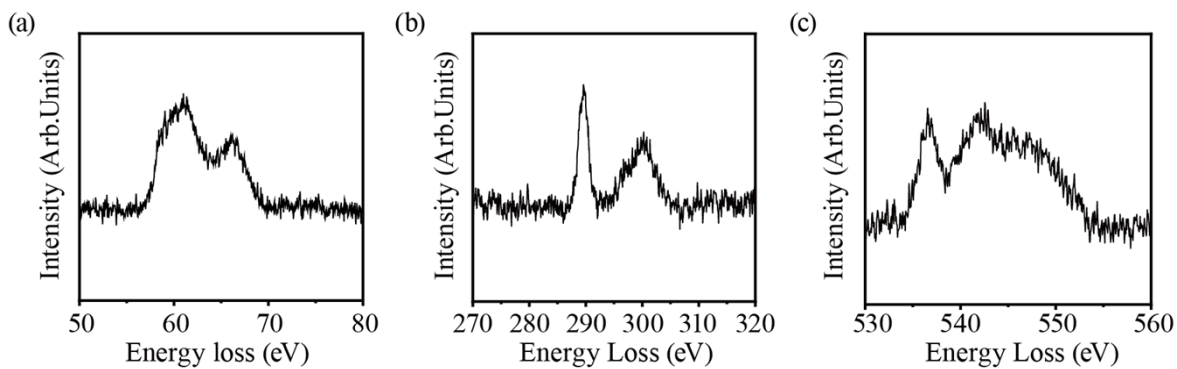

**Fig. S7** EELS confirmation of  $\text{Li}_2\text{CO}_3$ <sup>1,2</sup>. a) The Li K-edge spectrum of  $\text{Li}_2\text{CO}_3$  b) The C K-edge spectrum of  $\text{Li}_2\text{CO}_3$ . c) The O K-edge spectrum of  $\text{Li}_2\text{CO}_3$ .

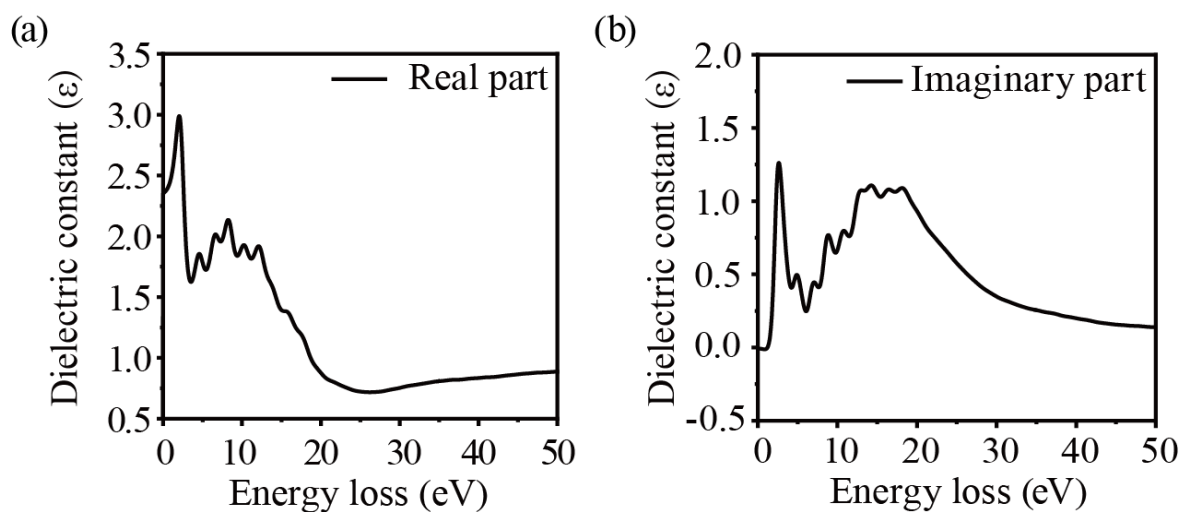

**Fig. S8** The a) real and d) imaginary parts of the dielectric constant obtained from EELS.

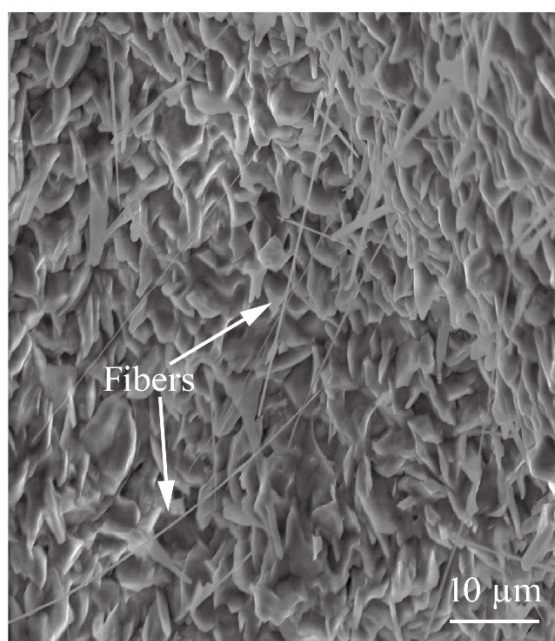

**Fig. S9** SEM original image of Figure 3h.

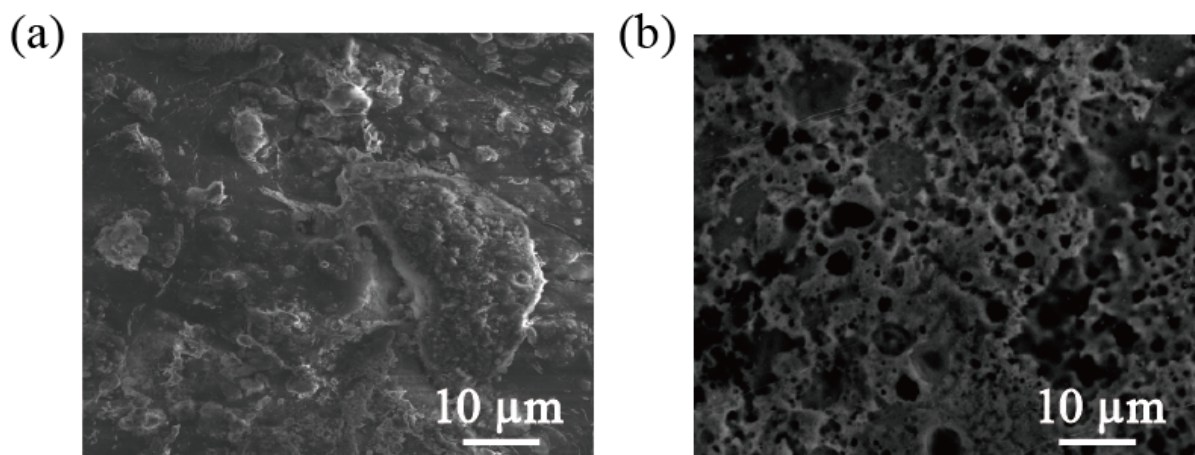

**Fig. S10** SEM images for the Li-Ga alloy surface after reaction with CO<sub>2</sub>. a) Reactions conducted at a) 50 °C and b) 200 °C showing the absence of fiber-like structures.

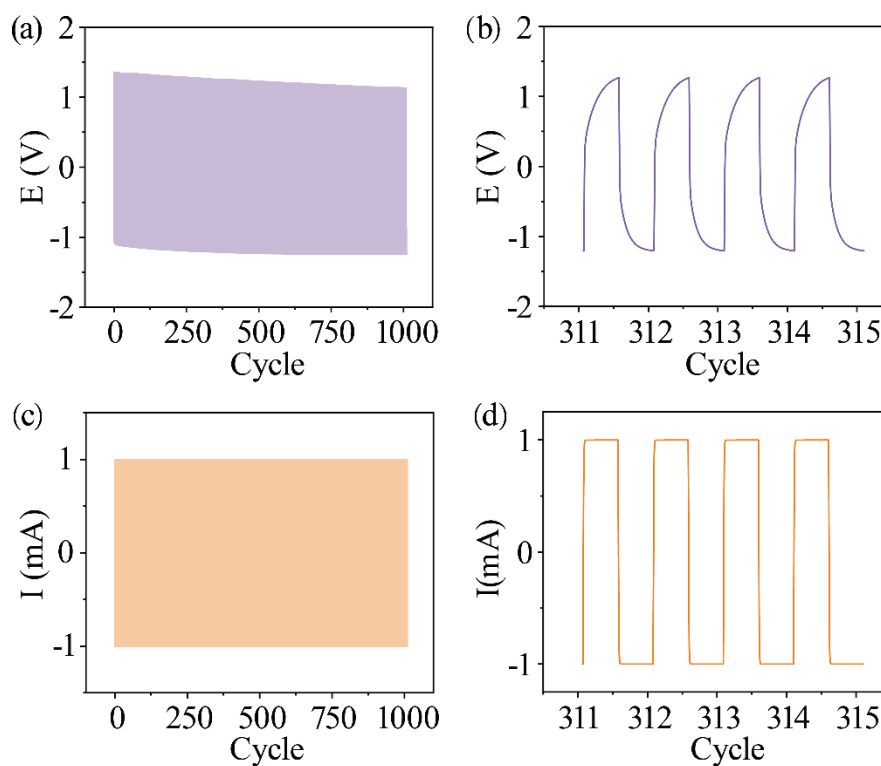

**Figure S10.** a and c) The charge–discharge cycling tests of the supercapacitor electrodes over 1000 cycles b) and d) are selected cycles for a) and c), respectively. The voltage shown is with respect to open circuit potential.

**Table S1.** CO<sub>2</sub> consumption in various reaction temperatures

| Temperature<br>(°C) | Mass of<br>alloy<br>(mg) | Li<br>(mg) | Li<br>(mmol) | CO <sub>2</sub><br>consumption<br>(mmol) | CO <sub>2</sub><br>consumption<br>(mg) | C<br>production<br>(mg) |
|---------------------|--------------------------|------------|--------------|------------------------------------------|----------------------------------------|-------------------------|
| 50                  | 1000                     | 2          | 0.29         | 0.17                                     | 7.45                                   | 1.02                    |
| 200                 | 1000                     | 2          | 0.29         | 0.18                                     | 8.06                                   | 1.10                    |
| 500                 | 1000                     | 2          | 0.29         | 0.20                                     | 8.89                                   | 1.21                    |

**Table S2** Capacitance of carbon-based electrodes in non-aqueous solvents

| <b>Nonaqueous electrolyte</b>          | <b>Electrode</b>                           | <b>C(Fg<sup>-1</sup>)</b> |
|----------------------------------------|--------------------------------------------|---------------------------|
| MeEt <sub>3</sub> NBF <sub>4</sub> /PC | Wheat straw-based activated carbon         | 160 <sup>3</sup>          |
| [EMIM][BF <sub>4</sub> ]               | Biomass-derived activated porous carbon    | 80 <sup>4</sup>           |
| TEABF <sub>4</sub> /PC                 | Carbon nanotubes                           | 158 <sup>5</sup>          |
| CuCl <sub>2</sub> /EMImBF <sub>4</sub> | Activated carbon                           | 225 <sup>5</sup>          |
| EMImBr/EMImBF <sub>4</sub>             | Activated carbon fiber cloths              | 59 <sup>5</sup>           |
| HQ/Et <sub>3</sub> NHTFSI              | Activated charcoal                         | 72 <sup>5</sup>           |
| EMIm-BF <sub>4</sub> /CAN              | Fibrous carbide-derived carbon             | 105.6 <sup>6</sup>        |
| <b>TBAPF<sub>6</sub>/NMP</b>           | <b>Carbon, lithium carbonate and oxide</b> | <b>165*</b>               |

\*This work



## Supplementary Information Video 1

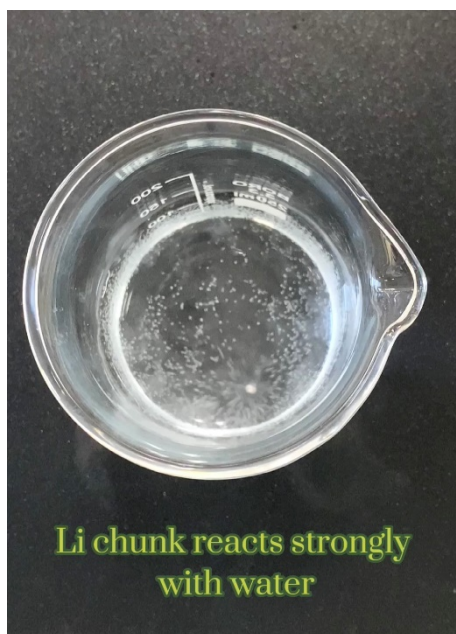

**Video S1. Li reacts strongly with water.** Lithium is highly reactive and flammable and it reacts rapidly with water at room temperature.

## Supplementary Information Video 2

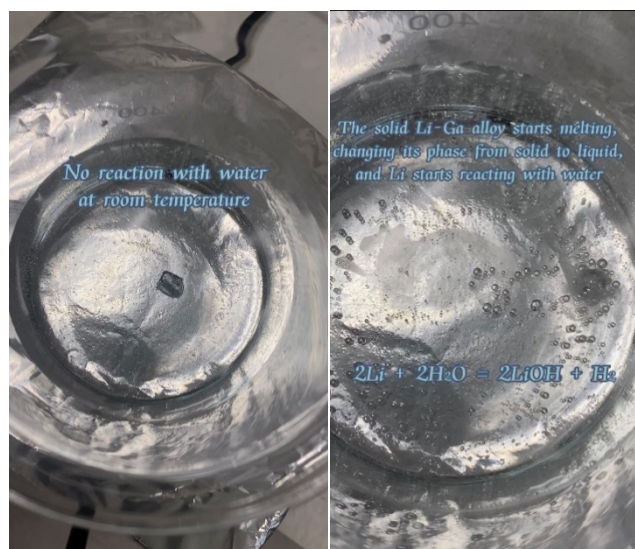

**Video S2. On-demand reaction.** When the temperature is below the melting point of Li-Ga alloy, the alloy is in its solid state and Li inside Ga would not react with water. When the temperature is above the melting point of the alloy, it becomes liquid and Li starts to react with water, which makes the reaction controllable.

### Supplementary Information Video 3

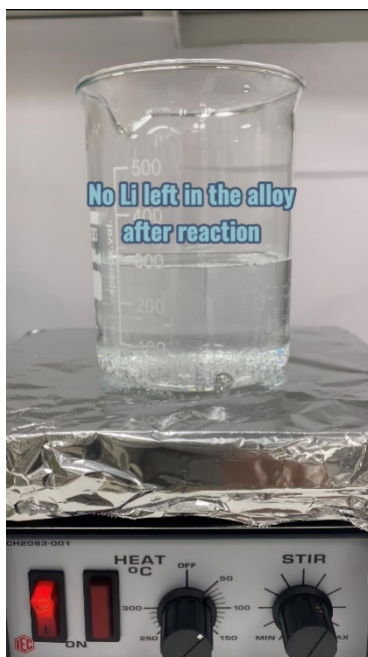

**Video S3. High yield of reaction.** During the reaction, Li-ions diffuse to the surface and completely react. After reaction, the surface of alloy was covered by a layer of black crust. The crust could be separated easily from the gallium base. When the remaining alloy was dropped into water, there was no reaction with water, showing all the Li migrated to the surface to react with CO<sub>2</sub>, no Li left in the gallium base.

### References

1. S. Basak, J. Jansen, Y. Kabiri and H. W. Zandbergen, *Ultramicroscopy*, 2018, **188**, 52-58.
2. B. Han, Z. Zhang, Y. C. Zou, K. Xu, G. Y. Xu, H. Wang, H. Meng, Y. H. Deng, J. Li and M. Gu, *Adv Mater*, 2021, **33**.
3. X. L. Li, C. L. Han, X. Y. Chen and C. W. Shi, *Micropor Mesopor Mat*, 2010, **131**, 303-309.
4. N. Sudhan, K. Subramani, M. Karnan, N. Ilayaraja and M. Sathish, *Energ Fuel*, 2017, **31**, 977-985.
5. J. Park, Y. E. Yoo, L. Q. Mai and W. Kim, *Acs Sustain Chem Eng*, 2019, **7**, 7728-7735.
6. S. Malmberg, M. Arulepp, E. Tarasova, V. Vassiljeva, I. Krasnou and A. Krumme, *C-J Carbon Res*, 2020, **6**.
